# Supplementary material for: The impact of a cash transfer programme on tuberculosis treatment success rate: a quasi-experimental study in Brazil
Source: PubMed Central journal article supplement (PMC6347926; doi:10.1136/bmjgh-2018-001029), 2019-01-24
Supplement: bmjgh-2018-001029supp001.pdf [file bmjgh-2018-001029supp001.pdf]

1 **Appendix 1 - Baseline Characteristics.**

2

3 The following table presents the baseline characteristics of the unmatched population and  
 4 the same characteristics after matching. Variables correspond to the covariates of the  
 5 DAG in Figure 1 in the manuscript that were included in the propensity score model.

6

7 **Table 1. Balance on covariates both before and after matching, stratified by receipt**  
 8 **of Bolsa Familia.**

| Group                  | <i>Unmatched</i> |               | <i>Matched (unweighted)</i> |               |
|------------------------|------------------|---------------|-----------------------------|---------------|
|                        | No BFP           | BFP           | No BFP                      | BFP           |
| N                      | 898              | 1269          | 6021                        | 6021          |
| <b>Sex (%)</b>         |                  |               |                             |               |
| F                      | 418 (46.5)       | 711 (56.0)    | 3432 (57.0)                 | 3323 (55.2)   |
| I                      | 0 (0.0)          | 1 (0.1)       | 0 (0.0)                     | 0 (0.0)       |
| M                      | 480 (53.5)       | 557 (43.9)    | 2589 (43.0)                 | 2698 (44.8)   |
| <b>Age (mean (sd))</b> |                  |               |                             |               |
|                        | 41.28 (18.19)    | 34.45 (14.21) | 34.86 (14.26)               | 34.85 (14.20) |
| <b>Race (%)</b>        |                  |               |                             |               |
| Branca                 | 311 (34.6)       | 321 (25.3)    | 1430 (23.8)                 | 1550 (25.7)   |
| Preta                  | 122 (13.6)       | 199 (15.7)    | 1081 (18.0)                 | 965 (16.0)    |
| Amarela                | 10 (1.1)         | 7 (0.6)       | 26 (0.4)                    | 36 (0.6)      |
| Parda                  | 451 (50.2)       | 736 (58.0)    | 3484 (57.9)                 | 3470 (57.6)   |
| Indigena               | 4 (0.4)          | 6 (0.5)       | 0 (0.0)                     | 0 (0.0)       |

|                                        |            |             |             |             |
|----------------------------------------|------------|-------------|-------------|-------------|
| <b>Indigenous = Not Indigenous (%)</b> | 896 (99.8) | 1268 (99.9) | 6007 (99.8) | 6016 (99.9) |
| <b>Quilombola = Not Quilombola (%)</b> | 895 (99.7) | 1267 (99.8) | 6012 (99.9) | 6016 (99.9) |
| <b>Years of Education (n years)</b>    |            |             |             |             |
| None                                   | 89 ( 9.9)  | 86 ( 6.8)   | 333 ( 5.5)  | 394 ( 6.5)  |
| Fundamental I incomplete (< 5)         | 201 (22.4) | 306 (24.1)  | 1578 (26.2) | 1439 (23.9) |
| Fundamental I complete (5)             | 92 (10.2)  | 139 (11.0)  | 680 (11.3)  | 657 (10.9)  |
| Fundamental II incomplete (< 9)        | 187 (20.8) | 348 (27.4)  | 1357 (22.5) | 1645 (27.3) |
| Fundamental II complete (9)            | 95 (10.6)  | 116 ( 9.1)  | 568 ( 9.4)  | 555 ( 9.2)  |
| Medio incomplete (< 12)                | 86 ( 9.6)  | 137 (10.8)  | 710 (11.8)  | 638 (10.6)  |
| Medio complete (12)                    | 130 (14.5) | 118 ( 9.3)  | 681 (11.3)  | 590 ( 9.8)  |
| Superior incomplete (< 16)             | 14 ( 1.6)  | 11 ( 0.9)   | 59 ( 1.0)   | 60 ( 1.0)   |
| Superior complete (16)                 | 4 ( 0.4)   | 8 ( 0.6)    | 55 ( 0.9)   | 43 ( 0.7)   |
| <b>Literacy = Illiterate (%)</b>       | 142 (15.8) | 153 (12.1)  | 632 (10.5)  | 720 (12.0)  |
| <b>Urban (%)</b>                       |            |             |             |             |
| Urban                                  | 838 (93.3) | 1121 (88.3) | 5064 (84.1) | 5383 (89.4) |
| Rural                                  | 54 ( 6.0)  | 129 (10.2)  | 801 (13.3)  | 544 ( 9.0)  |
| Periurban                              | 6 ( 0.7)   | 19 ( 1.5)   | 156 ( 2.6)  | 94 ( 1.6)   |
| <b>Water = No Running Water (%)</b>    | 76 ( 8.5)  | 172 (13.6)  | 800 (13.3)  | 738 (12.3)  |
| <b>Sewage (%)</b>                      |            |             |             |             |
| Sewage System                          | 461 (51.3) | 575 (45.3)  | 2705 (44.9) | 2849 (47.3) |
| Septic Tank                            | 176 (19.6) | 238 (18.8)  | 1077 (17.9) | 1103 (18.3) |

|            |            |            |             |             |
|------------|------------|------------|-------------|-------------|
| Tank       | 192 (21.4) | 372 (29.3) | 1953 (32.4) | 1717 (28.5) |
| Open Air   | 49 (5.5)   | 59 (4.6)   | 246 (4.1)   | 274 (4.6)   |
| Into Water | 1 (0.1)    | 10 (0.8)   | 2 (0.0)     | 10 (0.2)    |
| Other      | 19 (2.1)   | 15 (1.2)   | 38 (0.6)    | 68 (1.1)    |

---

**Electricity (%)**

|                 |            |             |             |             |
|-----------------|------------|-------------|-------------|-------------|
| Own Metered     | 792 (88.2) | 1002 (79.0) | 4801 (79.7) | 4839 (80.4) |
| Central Metered | 33 (3.7)   | 64 (5.0)    | 375 (6.2)   | 304 (5.0)   |
| Unmetered       | 53 (5.9)   | 134 (10.6)  | 448 (7.4)   | 591 (9.8)   |
| Gas or Oil      | 2 (0.2)    | 9 (0.7)     | 0 (0.0)     | 0 (0.0)     |
| Candle          | 4 (0.4)    | 8 (0.6)     | 24 (0.4)    | 37 (0.6)    |
| Other           | 14 (1.6)   | 52 (4.1)    | 373 (6.2)   | 250 (4.2)   |

---

**Water Source (%)**

|              |            |             |             |             |
|--------------|------------|-------------|-------------|-------------|
| Pipe Network | 801 (89.2) | 1040 (82.0) | 5032 (83.6) | 5067 (84.2) |
| Well         | 64 (7.1)   | 154 (12.1)  | 657 (10.9)  | 648 (10.8)  |
| Cistern      | 7 (0.8)    | 14 (1.1)    | 101 (1.7)   | 50 (0.8)    |
| Other        | 26 (2.9)   | 61 (4.8)    | 231 (3.8)   | 256 (4.3)   |

---

**Trash (%)**

|                  |            |             |             |             |
|------------------|------------|-------------|-------------|-------------|
| Direct Collect   | 759 (84.5) | 1003 (79.0) | 4923 (81.8) | 4856 (80.7) |
| Indirect Collect | 14 (1.6)   | 54 (4.3)    | 204 (3.4)   | 223 (3.7)   |
| Household        | 48 (5.3)   | 127 (10.0)  | 547 (9.1)   | 511 (8.5)   |
| Street           | 18 (2.0)   | 22 (1.7)    | 76 (1.3)    | 110 (1.8)   |

|       |           |           |            |            |
|-------|-----------|-----------|------------|------------|
| Other | 59 ( 6.6) | 63 ( 5.0) | 271 ( 4.5) | 321 ( 5.3) |
|-------|-----------|-----------|------------|------------|

---

**Thorax X-Ray (%)**

|                 |            |             |             |             |
|-----------------|------------|-------------|-------------|-------------|
| Suspect         | 763 (85.0) | 1009 (79.5) | 4954 (82.3) | 4821 (80.1) |
| Normal          | 43 ( 4.8)  | 70 ( 5.5)   | 286 ( 4.8)  | 321 ( 5.3)  |
| Other Pathology | 11 ( 1.2)  | 14 ( 1.1)   | 26 ( 0.4)   | 62 ( 1.0)   |
| Not Undertaken  | 81 ( 9.0)  | 176 (13.9)  | 755 (12.5)  | 817 (13.6)  |

---

**Initial Bacilloscopy (%)**

|               |            |            |             |             |
|---------------|------------|------------|-------------|-------------|
| Positive      | 206 (22.9) | 329 (25.9) | 1452 (24.1) | 1543 (25.6) |
| Negative      | 291 (32.4) | 385 (30.3) | 1725 (28.6) | 1813 (30.1) |
| Not Performed | 401 (44.7) | 555 (43.7) | 2844 (47.2) | 2665 (44.3) |

---

**Form (%)**

|                |            |             |             |             |
|----------------|------------|-------------|-------------|-------------|
| Pulmonary      | 763 (85.0) | 1079 (85.0) | 5337 (88.6) | 5143 (85.4) |
| Extrapulmonary | 108 (12.0) | 159 (12.5)  | 596 ( 9.9)  | 738 (12.3)  |
| Both P & E     | 27 ( 3.0)  | 31 ( 2.4)   | 88 ( 1.5)   | 140 ( 2.3)  |

---

**Throat Culture (%)**

|               |            |             |             |             |
|---------------|------------|-------------|-------------|-------------|
| Positive      | 79 ( 8.8)  | 111 ( 8.7)  | 587 ( 9.7)  | 508 ( 8.4)  |
| Negative      | 88 ( 9.8)  | 83 ( 6.5)   | 571 ( 9.5)  | 399 ( 6.6)  |
| In Progress   | 40 ( 4.5)  | 74 ( 5.8)   | 450 ( 7.5)  | 330 ( 5.5)  |
| Not Performed | 691 (76.9) | 1001 (78.9) | 4413 (73.3) | 4784 (79.5) |

---

**Tuberculin Skin Test (%)**

|             |           |           |            |            |
|-------------|-----------|-----------|------------|------------|
| No Reaction | 61 ( 6.8) | 79 ( 6.2) | 414 ( 6.9) | 366 ( 6.1) |
|-------------|-----------|-----------|------------|------------|

|                 |            |            |             |             |
|-----------------|------------|------------|-------------|-------------|
| Some Reaction   | 24 ( 2.7)  | 29 ( 2.3)  | 73 ( 1.2)   | 136 ( 2.3)  |
| Strong Reaction | 160 (17.8) | 244 (19.2) | 1198 (19.9) | 1104 (18.3) |
| Not Performed   | 653 (72.7) | 917 (72.3) | 4336 (72.0) | 4415 (73.3) |

---

**Directly Observed Treatment (%)**

|         |            |            |             |             |
|---------|------------|------------|-------------|-------------|
| DOT     | 434 (48.3) | 692 (54.5) | 3595 (59.7) | 3198 (53.1) |
| No DOT  | 458 (51.0) | 563 (44.4) | 2417 (40.1) | 2768 (46.0) |
| Unknown | 6 ( 0.7)   | 14 ( 1.1)  | 9 ( 0.1)    | 55 ( 0.9)   |

---

|                                    |           |           |            |            |
|------------------------------------|-----------|-----------|------------|------------|
| <b>Rifampicin = Not Taking (%)</b> | 20 ( 2.2) | 21 ( 1.7) | 202 ( 3.4) | 102 ( 1.7) |
|------------------------------------|-----------|-----------|------------|------------|

---

|                                   |           |           |            |           |
|-----------------------------------|-----------|-----------|------------|-----------|
| <b>Isoniazid = Not Taking (%)</b> | 18 ( 2.0) | 17 ( 1.3) | 193 ( 3.2) | 81 ( 1.3) |
|-----------------------------------|-----------|-----------|------------|-----------|

---

|                                    |            |            |             |             |
|------------------------------------|------------|------------|-------------|-------------|
| <b>Ethambutol = Not Taking (%)</b> | 245 (27.3) | 348 (27.4) | 1439 (23.9) | 1689 (28.1) |
|------------------------------------|------------|------------|-------------|-------------|

---

|                                      |            |             |             |             |
|--------------------------------------|------------|-------------|-------------|-------------|
| <b>Streptomycin = Not Taking (%)</b> | 889 (99.0) | 1260 (99.3) | 5990 (99.5) | 5975 (99.2) |
|--------------------------------------|------------|-------------|-------------|-------------|

---

|                                      |           |           |            |            |
|--------------------------------------|-----------|-----------|------------|------------|
| <b>Pyrazinamide = Not Taking (%)</b> | 26 ( 2.9) | 30 ( 2.4) | 320 ( 5.3) | 148 ( 2.5) |
|--------------------------------------|-----------|-----------|------------|------------|

---

|                                     |            |             |             |             |
|-------------------------------------|------------|-------------|-------------|-------------|
| <b>Ethionamide = Not Taking (%)</b> | 882 (98.2) | 1253 (98.7) | 5991 (99.5) | 5944 (98.7) |
|-------------------------------------|------------|-------------|-------------|-------------|

---

|                                     |            |             |             |             |
|-------------------------------------|------------|-------------|-------------|-------------|
| <b>Other Drugs = Not Taking (%)</b> | 861 (95.9) | 1234 (97.2) | 5765 (95.7) | 5842 (97.0) |
|-------------------------------------|------------|-------------|-------------|-------------|

---

|                           |            |             |             |             |
|---------------------------|------------|-------------|-------------|-------------|
| <b>AIDS = No AIDS (%)</b> | 819 (91.2) | 1207 (95.1) | 5778 (96.0) | 5705 (94.8) |
|---------------------------|------------|-------------|-------------|-------------|

---

|                                       |            |             |             |             |
|---------------------------------------|------------|-------------|-------------|-------------|
| <b>Alcoholism = No Alcoholism (%)</b> | 809 (90.1) | 1139 (89.8) | 5451 (90.5) | 5387 (89.5) |
|---------------------------------------|------------|-------------|-------------|-------------|

---

|                                   |            |             |             |             |
|-----------------------------------|------------|-------------|-------------|-------------|
| <b>Diabetes = No Diabetes (%)</b> | 831 (92.5) | 1183 (93.2) | 5502 (91.4) | 5614 (93.2) |
|-----------------------------------|------------|-------------|-------------|-------------|

---

**HIV (%)**

|             |            |            |             |             |
|-------------|------------|------------|-------------|-------------|
| Positive    | 89 ( 9.9)  | 69 ( 5.4)  | 261 ( 4.3)  | 354 ( 5.9)  |
| Negative    | 526 (58.6) | 744 (58.6) | 3966 (65.9) | 3507 (58.2) |
| In Progress | 40 ( 4.5)  | 84 ( 6.6)  | 205 ( 3.4)  | 376 ( 6.2)  |

|                                                 |                    |                 |                 |                 |
|-------------------------------------------------|--------------------|-----------------|-----------------|-----------------|
| Not Undertaken                                  | 243 (27.1)         | 372 (29.3)      | 1589 (26.4)     | 1784 (29.6)     |
| <b>Mental Disorder = No Mental Disorder (%)</b> | 875 (97.4)         | 1260 (99.3)     | 5991 (99.5)     | 5975 (99.2)     |
| <b>Other Disorder = No Disorder (%)</b>         | 777 (86.5)         | 1115 (87.9)     | 5379 (89.3)     | 5292 (87.9)     |
| <b>Food Expenditure (mean (sd))</b>             | 209.50<br>(131.61) | 184.69 (118.13) | 192.67 (114.22) | 183.22 (117.68) |
| <b>Energy Expenditure (mean (sd))</b>           | 40.17 (34.37)      | 32.45 (30.64)   | 36.22 (30.73)   | 32.70 (30.38)   |
| <b>Gas Expenditure (mean (sd))</b>              | 33.69 (20.21)      | 32.75 (13.26)   | 33.04 (11.53)   | 32.86 (13.15)   |
| <b>Water Expenditure (mean (sd))</b>            | 22.33 (20.15)      | 18.28 (21.99)   | 18.83 (18.93)   | 18.52 (20.43)   |
| <b>Child Work = No Child Worker (%)</b>         | 881 (98.1)         | 1223 (96.4)     | 5893 (97.9)     | 5814 (96.6)     |
| <b>Institutionalised (%)</b>                    |                    |                 |                 |                 |
| None                                            | 820 (91.3)         | 1181 (93.1)     | 5688 (94.5)     | 5619 (93.3)     |
| Military                                        | 30 ( 3.3)          | 33 ( 2.6)       | 173 ( 2.9)      | 172 ( 2.9)      |
| Asylum                                          | 0 ( 0.0)           | 1 ( 0.1)        | 0 ( 0.0)        | 0 ( 0.0)        |
| Orphanage                                       | 0 ( 0.0)           | 2 ( 0.2)        | 0 ( 0.0)        | 0 ( 0.0)        |
| Psychiatric                                     | 1 ( 0.1)           | 1 ( 0.1)        | 0 ( 0.0)        | 0 ( 0.0)        |
| Other                                           | 22 ( 2.4)          | 27 ( 2.1)       | 67 ( 1.1)       | 113 ( 1.9)      |
| Unknown                                         | 25 ( 2.8)          | 24 ( 1.9)       | 93 ( 1.5)       | 117 ( 1.9)      |
| <b>Work Acquired TB (%)</b>                     |                    |                 |                 |                 |
| Got at work                                     | 20 ( 2.2)          | 24 ( 1.9)       | 109 ( 1.8)      | 114 ( 1.9)      |
| Not at work                                     | 790 (88.0)         | 1134 (89.4)     | 5281 (87.7)     | 5370 (89.2)     |
| Unknown                                         | 88 ( 9.8)          | 111 ( 8.7)      | 631 (10.5)      | 537 ( 8.9)      |

| State (%)           |            |            |             |             |
|---------------------|------------|------------|-------------|-------------|
| Rondonia            | 3 ( 0.3)   | 7 ( 0.6)   | 0 ( 0.0)    | 0 ( 0.0)    |
| Acre                | 6 ( 0.7)   | 14 ( 1.1)  | 47 ( 0.8)   | 46 ( 0.8)   |
| Amazonias           | 47 ( 5.2)  | 112 ( 8.8) | 514 ( 8.5)  | 528 ( 8.8)  |
| Roraima             | 2 ( 0.2)   | 5 ( 0.4)   | 1 ( 0.0)    | 15 ( 0.2)   |
| Para                | 22 ( 2.4)  | 39 ( 3.1)  | 304 ( 5.0)  | 187 ( 3.1)  |
| Amapa               | 0 ( 0.0)   | 2 ( 0.2)   | 0 ( 0.0)    | 0 ( 0.0)    |
| Tocantins           | 7 ( 0.8)   | 3 ( 0.2)   | 15 ( 0.2)   | 16 ( 0.3)   |
| Maranhao            | 48 ( 5.3)  | 70 ( 5.5)  | 288 ( 4.8)  | 353 ( 5.9)  |
| Piaui               | 19 ( 2.1)  | 32 ( 2.5)  | 76 ( 1.3)   | 122 ( 2.0)  |
| Ceara               | 118 (13.1) | 214 (16.9) | 1267 (21.0) | 1040 (17.3) |
| Rio Grande do Norte | 7 ( 0.8)   | 20 ( 1.6)  | 17 ( 0.3)   | 72 ( 1.2)   |
| Paraiba             | 7 ( 0.8)   | 23 ( 1.8)  | 62 ( 1.0)   | 118 ( 2.0)  |
| Pernambuco          | 27 ( 3.0)  | 63 ( 5.0)  | 128 ( 2.1)  | 287 ( 4.8)  |
| Alagoas             | 18 ( 2.0)  | 35 ( 2.8)  | 294 ( 4.9)  | 166 ( 2.8)  |
| Sergipe             | 15 ( 1.7)  | 36 ( 2.8)  | 150 ( 2.5)  | 166 ( 2.8)  |
| Bahia               | 68 ( 7.6)  | 106 ( 8.4) | 387 ( 6.4)  | 504 ( 8.4)  |
| Minas Gerais        | 60 ( 6.7)  | 81 ( 6.4)  | 436 ( 7.2)  | 404 ( 6.7)  |
| Espirito Santo      | 39 ( 4.3)  | 34 ( 2.7)  | 126 ( 2.1)  | 158 ( 2.6)  |
| Rio de Janeiro      | 55 ( 6.1)  | 110 ( 8.7) | 375 ( 6.2)  | 536 ( 8.9)  |
| Parana              | 102 (11.4) | 82 ( 6.5)  | 485 ( 8.1)  | 420 ( 7.0)  |

|                           |                 |               |               |               |
|---------------------------|-----------------|---------------|---------------|---------------|
| Santa Catarina            | 53 ( 5.9)       | 18 ( 1.4)     | 62 ( 1.0)     | 91 ( 1.5)     |
| Rio Grande do Sul         | 117 (13.0)      | 115 ( 9.1)    | 758 (12.6)    | 588 ( 9.8)    |
| Mato Grosso do Sul        | 18 ( 2.0)       | 16 ( 1.3)     | 63 ( 1.0)     | 68 ( 1.1)     |
| Mato Grosso               | 17 ( 1.9)       | 20 ( 1.6)     | 116 ( 1.9)    | 80 ( 1.3)     |
| Goias                     | 14 ( 1.6)       | 9 ( 0.7)      | 24 ( 0.4)     | 41 ( 0.7)     |
| Distrito Federal          | 9 ( 1.0)        | 3 ( 0.2)      | 26 ( 0.4)     | 15 ( 0.2)     |
| <b>Income</b> (mean (sd)) | 197.39 (465.17) | 65.22 (56.04) | 74.05 (57.81) | 68.36 (58.05) |

9

10 Covariates are grouped by DAG node including *Sex & Age* (Sex, Age), *Race* (Race, Indigenous,  
11 Quilombola), *Education* (Education Level, Literacy), *Local Area* (Urban, Running Water, Sewage,  
12 Electricity, Water Store, Trash), *Type of TB* (Thorax X-Ray, Initial Bacilloscopy, Form, Throat  
13 Culture, Tuberculin Skin Test), *Directly Observed Treatment* (DOT), *Drugs* (Rifampicin, Isoniazid,  
14 Ethambutol, Streptomycin, Pyrazinamide, Ethionamide, Other Drugs), *Comorbidities* (AIDS,  
15 Alcoholism, Diabetes, HIV, Mental Disorder, Other Disorder), *Expenditure* (on Food, Energy, Gas,  
16 and Water), *Social Vulnerability* (Child Worker, Institutionalised, Work Acquired TB), *State*, and  
17 *Income*. Where duplicate variables existed, SINAN was used preferentially.

18



19 **Appendix 2 – Missing Data**

20  
21 Though it was not the primary analytical method for this work, a confirmatory sensitivity  
22 analysis using multiple imputation was undertaken using the MICE (multiple imputation  
23 by chained equations) approach, as implemented in the MICE package in R.[1-2] The  
24 MICE package defaults of predictive mean matching and polytomous regression were  
25 used as the imputation methods for numeric and categorical variables respectively,  
26 creating 5 multiply imputed datasets.

27 The literature is still unclear as to whether the pooling of propensity scores themselves or  
28 the pooling of treatment estimates is the better approach after multiple imputation. Here,  
29 we followed Leyrat et al. (2016) and applied Rubin’s rules to pool the ATT estimates from  
30 each imputed dataset.[3-4] The ATT estimates were based on a comparison between  
31 groups that were matched on the propensity score estimated by the same model  
32 specification used for Model A. The resulting estimated ATT was 7.22, in broad  
33 agreement with other results.

34 An approach combining multiple imputation and propensity score methods was not used  
35 for the primary analysis due to numerous unresolved questions that admit the possibility  
36 for an unknown amount of bias with regards to the estimation of variance after pooling,  
37 the timing of pooling datasets, the best number of datasets to impute, the best method  
38 for handling imputations, at a minimum. Practical guidelines for methods that more  
39 efficiently and robustly account for the incompleteness of data within estimation methods  
40 based on the propensity score are needed, but research in this area is ongoing.

41  
42  
43  
44

45 **References**

- 46 1. Buuren S van, Groothuis-Oudshoorn K. mice: Multivariate Imputation by Chained Equations  
47 in R. J Stat Softw. 2011;45. Available: <http://www.jstatsoft.org/v45/i03>
- 48 2. Azur MJ, Stuart EA, Frangakis C, Leaf PJ. Multiple Imputation by Chained Equations: What  
49 is it and how does it work? Int J Methods Psychiatr Res. 2011;20: 40–49. doi:10.1002/mpr.329
- 50 3. Leyrat C, Seaman SR, White IR, Douglas I, Smeeth L, Kim J, et al. Propensity score analysis  
51 with partially observed confounders: how should multiple imputation be used?  
52 ArXiv160805606 Stat. 2016; Available: <http://arxiv.org/abs/1608.05606>
- 53 4. Rubin DB. Inference and missing data. Biometrika. 1976;63: 581–592.  
54 doi:10.1093/biomet/63.3.581

55
